# Supplementary material
Source: publisher figshare collection journal article supplement (https://acs.figshare.com/ndownloader/files/22114404)
Supplement: Supplementary file 1 [file 22114404]

Compound_ID	SMILES	T,brucei	T,cruzi	L,infantum	P, falciparum	MRC5	PMM	TbrPDEB1	hPDE4
1	COC1=C(OC)C=C(C=C1)C1=NN(C2CCN(CC2)C(=O)CN2C(=O)CC(C)(C)CC2=O)C(=O)[C@H]2CC=CC[C@@H]12	6,35 ± 0,08	4,42 ± 0,05	4,19 ± 0,01	4,96 ± 0,23	4,35 ± 0,18	4,19 ± 0,01	7,36 ± 0,26	10,27 ± 0,17
2	COC1=C(OC)C=C(C=C1)C1=NN(C2CCN(CC2)C2=C3SC=CC3=NC=N2)C(=O)[C@@H]2CC=CC[C@H]12	6,45 ± 0,12	5,07 ± 0,03	5,20 ± 0,80	6,02 ± 0,48	4,93 ± 0,35	4,80 ± 0,50	7,18 ± 0,28	9,99 ± 0,18
3	COC1=CC=C(C=C1OC)C1=NN(C2CCN(CC2)C2=C3N=CNC3=NC(N)=N2)C(=O)[C@@H]2CC=CC[C@H]12	5,77 ± 0,02	4,52 ± 0,01	4,48 ± 0,01	5,03 ± 0,18	4,75 ± 0,17	4,34 ± 0,21	6,98 ± 0,15	9,06 ± 0,22
4	COC1=CC=C(C=C1OC)C1=NN(C2CCN(CC2)C2=NC(N)=C3C=CC=CC3=N2)C(=O)[C@@H]2CC=CC[C@H]12	6,06 ± 0,25	5,57 ± 0,10	5,36 ± 0,20	5,34 ± 0,23	5,13 ± 0,04	5,10 ± 0,01	6,19 ± 0,10	8,61 ± 0,05
5	COC1=CC=C(C=C1OC)C1=NN(C2CCN(CC2)C2=NC(N)=C3SC=CC3=N2)C(=O)[C@@H]2CC=CC[C@H]12	5,75 ± 0,06	5,03 ± 0,01	4,77 ± 0,38	5,13 ± 0,31	4,19 ± 0,01	4,19 ± 0,01	6,47 ± 0,05	9,17 ± 0,08
6	COC1=CC=C(C=C1OC)C1=NN(C2CCN(CC2)C2=NC=C3C=CC=CC3=N2)C(=O)[C@@H]2CC=CC[C@H]12	5,77 ± 0,16	5,07 ± 0,02	4,69 ± 0,01	4,87 ± 0,11	4,19 ± 0,01	4,49 ± 0,01	6,19 ± 0,03	9,23 ± 0,24
7	COC1=CC=C(C=C1OC)C1=NN(C2CCN(CC2)C2=C3C=CC=CC3=NC=N2)C(=O)[C@@H]2CC=CC[C@H]12	6,58 ± 0,03	5,39 ± 0,51	4,69 ± 0,01	5,26 ± 0,23	5,52 ± 0,4	4,49 ± 0,01	6,19 ± 0,13	9,65 ± 0,21
8	COC1=CC=C(C=C1OC)C1=NN(C2CCN(CC2)C2=CC=NC(N)=N2)C(=O)[C@@H]2CC=CC[C@H]12	5,44 ± 0,44	4,61 ± 0,59	4,85 ± 0,07	4,93 ± 0,15	5,41 ± 0,15	4,49 ± 0,01	6,59 ± 0,16	9,29 ± 0,06
9	COC1=CC=C(C=C1OC)C1=NN(C2CCN(CC2)C2=NC=CC(N)=N2)C(=O)[C@@H]2CC=CC[C@H]12	5,73 ± 0,07	4,86 ± 0,36	4,63 ± 0,09	4,44 ± 0,12	4,76 ± 0,02	4,49 ± 0,01	6,96 ± 0,21	9,50 ± 0,21
10	[H][C@@]12CC=CC[C@]1([H])C(=NN(C1CCN(CC1)C1=NC=C3SC=CC3=N1)C2=O)C1=CC=C(OC)C(OC)=C1	5,64 ± 0,05	5,08 ± 0,03	4,37 ± 0,01	5,51 ± 0,27	4,19 ± 0,01	4,19 ± 0,01	6,16 ± 0,06	9,20 ± 0,26
11	[H][C@@]12CC=CC[C@]1([H])C(=NN(C1CCN(CC1)C1=C3C=CSC3=NC(N)=N1)C2=O)C1=CC=C(OC)C(OC)=C1	6,44 ± 0,13	5,21 ± 0,22	4,91 ± 0,25	5,69 ± 0,48	4,22 ± 0,06	4,49 ± 0,01	7,37 ± 0,03	6,45 ± 0,11
12	COC1=C(OC)C=C(C=C1)C1=NN(C2CCN(CC2)C2=NC(N)=NC3=CC=CC=C23)C(=O)[C@@H]2CC=CC[C@H]12	6,09 ± 0,16	5,09 ± 0,04	5,18 ± 0,08	5,73 ± 0,06	5,11 ± 0,01	5,1 ± 0,01	7,61 ± 0,08	9,81 ± 0,05
14	COC1=C(OC)C=C(C=C1)C1=NN(C2CCN(CC2)C(=O)CN2C(=O)CCC2=O)C(=O)[C@@H]2CC=CC[C@H]12	5,73 ± 0,05	4,19 ± 0,00	4,19 ± 0,00	4,47 ± 0,00	4,19 ± 0,00	4,19 ± 0,00	7,68 ± 0,14	10,21 ± 0,08
15	[H][C@@]12CC=CC[C@]1([H])C(=NN(C1CCN(CC1)C(=O)CN1C(=O)CC(C)C1=O)C2=O)C1=CC=C(OC)C(OC)=C1	5,74 ± 0,02	4,19 ± 0,01	4,19 ± 0,01	5,53 ± 0,04	4,19 ± 0,01	4,19 ± 0,01	7,12 ± 0,10	9,77 ± 0,04
16	COC1=CC=C(C=C1OC)C1=NN(C2CCN(CC2)C(=O)CN2C(=O)CC(CC3=CC=CC=C3)C2=O)C(=O)[C@@H]2CC=CC[C@H]12	4,19 ± 0,01	4,19 ± 0,01	4,19 ± 0,01	4,24 ± 0,01	4,19 ± 0,01	4,19 ± 0,01	7,01 ± 0,21	9,50 ± 0,14
17	[H][C@@]12CC=CC[C@]1([H])C(=NN(C1CCN(CC1)C(=O)CN1C(=O)CC3(CCCCC3)CC1=O)C2=O)C1=CC=C(OC)C(OC)=C1	6,32 ± 0,05	4,91 ± 0,12	4,49 ± 0,01	5,37 ± 0,32	4,50 ± 0,38	4,49 ± 0,01	7,51 ± 0,06	9,81 ± 0,03
24	COC1=C(Cl)C=C(C=C1)C1=NN(C2CCN(CC2)C2=C3C=CSC3=NC(N)=N2)C(=O)C2CC=CCC12	5,7 ± 0,01	5,16 ± 0,2	5,40 ± 0,14	5,41 ± 0,36	4,19 ± 0,01	4,49 ± 0,01	6,08 ± 0,09	7,52 ± 0,16
25	NC1=NC(N2CCC(CC2)N2N=C(C3CC=CCC3C2=O)C2=CC=C(F)C=C2)=C2C=CSC2=N1	5,68 ± 0,03	5,63 ± 0,03	5,45 ± 0,50	4,94 ± 0,29	4,19 ± 0,01	4,80 ± 0,43	<5,03	nd
26	NC1=NC(N2CCC(CC2)N2N=C(C3CC=CCC3C2=O)C2=CC(F)=C(F)C=C2)=C2C=CSC2=N1	5,72 ± 0,04	5,16 ± 0,07	5,64 ± 0,03	5,40 ± 0,24	4,19 ± 0,01	4,80 ± 0,43	<5,08	nd
27	FC1=CC=C(C=C1F)C1=NN(C2CCN(CC2)C2=C3SC=CC3=NC=N2)C(=O)C2CC=CCC12	4,88 ± 0,43	5,10 ± 0,77	4,93 ± 0,34	4,93 ± 0,36	4,42 ± 0,32	4,49 ± 0,01	<5,25	nd
28	CC1(C)CC(=O)N(CC(=O)N2CCC(CC2)N2N=C(C3CC=CCC3C2=O)C2=CC=C(F)C=C2)C(=O)C1	4,19 ± 0,01	4,37 ± 0,25	4,49 ± 0,01	4,61 ± 0,05	4,53 ± 0,01	4,19 ± 0,01	7,11± 0,06	9,92 ± 0,23
29	FC1=CC=C(C=C1)C1=NN(C2CCN(CC2)C(=O)CN2C(=O)CC3(CCCCC3)CC2=O)C(=O)C2CC=CCC12	4,99 ± 0,01	4,81 ± 0,46	4,99 ± 0,04	4,75 ± 0,06	4,19 ± 0,01	4,49 ± 0,01	<5,02	nd
30	FC1=CC=C(C=C1)C1=NN(C2CCN(CC2)C(=O)CN2C(=O)CC3(CCCC3)CC2=O)C(=O)C2CC=CCC12	4,49 ± 0,00	4,81 ± 0,48	4,79 ± 0,32	4,64 ± 0,08	4,39 ± 0,02	4,49 ± 0,01	<4,78	nd
31	FC1=C(F)C=C(C=C1)C1=NN(C2CCN(CC2)C(=O)CN2C(=O)CC3(CCCCC3)CC2=O)C(=O)C2CC=CCC12	4,48 ± 0,01	5,1 ± 0,01	4,79 ± 0,43		4,19 ± 0,01	4,19 ± 0,01	<5,34	nd
32	CC1(C)CC(=O)N(CC(=O)N2CCC(CC2)N2N=C(C3CC=CCC3C2=O)C2=CC(F)=C(F)C=C2)C(=O)C1	4,32 ± 0,18	4,70 ± 0,29	4,43 ± 0,09		4,51 ± 0,04	4,19 ± 0,01	<5,01	nd
35	[H][C@@]12CC=CC[C@]1([H])C(=NN(C1CCN(CC1)C(=O)CN1C(=O)CC(C)(C)CC1=O)C2=O)C1=CC(OC(F)F)=C(OC(F)F)C=C1	6,00 ± 0,42	4,37 ± 0,02	4,34 ± 0,21	5,57 ± 0,05	4,19 ± 0,01	4,34 ± 0,21	6,39 ± 0,01	9,52 ± 0,14
36	FC(F)OC1=C(OC(F)F)C=C(C=C1)C1=NN(C2CCN(CC2)C(=O)CN2C(=O)CC3(CCCCC3)CC2=O)C(=O)[C@@H]2CC=CC[C@H]12	5,12 ± 0,06	4,34 ± 0,2	4,24 ± 0,07	5,39 ± 0,39	4,19 ± 0,01	4,19 ± 0,01	6,11 ± 0,04	9,32 ± 0,08
37	[H][C@@]12CC=CC[C@]1([H])C(=NN(C1CCN(CC1)C1=C3SC=CC3=NC=N1)C2=O)C1=CC=C(O)C(O)=C1	5,30 ± 0,07	5,11 ± 0,01	5,09 ± 0,18	5,14 ± 0,14	4,61 ± 0,33	4,80 ± 0,43	6,05 ± 0,11	7,20 ± 0,15
38	[H][C@@]12CC=CC[C@]1([H])C(=NN(C1CCN(CC1)C1=C3SC=CC3=NC=N1)C2=O)C1=CC=C(OC(F)F)C(OC(F)F)=C1	5,17 ± 0,01	5,68 ± 0,02	5,09 ± 0,01	5,42 ± 0,04	4,19 ± 0,01	4,80 ± 0,43	<5,67	nd
39	[H][C@@]12CC=CC[C@]1([H])C(=NN(C1CCN(CC1)C1=C3SC=CC3=NC=N1)C2=O)C1=CC=C(OC(F)F)C(O)=C1	5,48 ± 0,36	5,19 ± 0,04	5,08 ± 0,02	5,41 ± 0,07	4,19 ± 0,01	4,80 ± 0,43	<5,78	nd
41	COC1=CC=C(C=C1OC)C1=NNC(=O)N2C=CN=C12	4,19 ± 0,01	4,19 ± 0,01	4,19 ± 0,01	4,19 ± 0,01	4,19 ± 0,01	4,19 ± 0,01	<4,50	nd
42	COC1=CC=C(C=C1OC)C1=NN(C2CCNCC2)C(=O)N2C=CN=C12	4,49 ± 0,01	4,19 ± 0,01	4,27 ± 0,11	4,27 ± 0,11	4,19 ± 0,01	4,19 ± 0,01	<4,50	nd
43	COC1=C(OC)C=C(C=C1)C1=NN(C2CCN(CC2)C2=NC(N)=NC3=C2C=CS3)C(=O)N2C=CN=C12	4,19 ± 0,01	4,19 ± 0,01	4,19 ± 0,11	4,27 ± 0,01	4,19 ± 0,01	4,19 ± 0,01	<4,74	nd
44	[H][C@@]12CCCC[C@]1([H])C(=NN(C1CCN(CC1)C1=C3C=CSC3=NC(N)=N1)C2=O)C1=CC=C(OC)C(OC)=C1	6,06 ± 0,23	5,09 ± 0,02	5,03 ± 0,09	5,21 ± 0,56	4,37 ± 0,20	4,65 ± 0,30	7,03 ± 0,20	9,18 ± 0,16
45	COC1=C(OC)C=C(C=C1)C1=NN(C2CCN(CC2)C(=O)CN2C(=O)CC3(CCCCC3)CC2=O)C(=O)[C@@H]2CCCC[C@H]12	5,71 ± 0,16	4,8 ± 0,36	4,52 ± 0,06	5,21 ± 0,51	4,90 ± 0,24	4,19 ± 0,01	<5,01	nd
46	CC1(C)CC(=O)N(CC(=O)N2CCC(CC2)N2N=C(C3CCCCC3C2=O)C2=CC(F)=C(F)C=C2)C(=O)C1	4,34 ± 0,21	4,37 ± 0,24	4,56 ± 0,19		4,37 ± 0,24	4,19 ± 0,01	<4,65	nd
47	FC1=CC=C(C=C1F)C1=NN(C2CCN(CC2)C(=O)CN2C(=O)CC3(CCCCC3)CC2=O)C(=O)C2CCCCC12	5,12 ± 0,01	5,09 ± 0,01	5,09 ± 0,01	5,13 ± 0,29	4,19 ± 0,01	4,19 ± 0,01	<5,16	nd
48	COC1=C(OC)C=C(C=C1)C1=NN(C2CCN(CC2)C(=O)CN2C(=O)CC(C)(C)CC2=O)C(=O)[C@@H]2CCCC[C@H]12	5,71 ± 0,01	4,39 ± 0,12	4,33 ± 0,19	5,11 ± 0,41	4,25 ± 0,07	4,19 ± 0,01	7,07 ± 0,18	9,79 ± 0,28
49	CC1(C)CC(=O)N(CC(=O)N2CCC(CC2)N2N=C([C@H]3CCCC[C@H]3C2=O)C2=CC(OC(F)F)=C(OC(F)F)C=C2)C(=O)C1	5,19 ± 0,03	5,00 ± 0,05	4,77 ± 0,29	5,31 ± 0,26	4,19 ± 0,01	4,42 ± 0,11	<5,80	nd
51	COC1=C(OC)C=C(C=C1)C1=NN(C2CCN(CC2)C2=NC(N)=NC3=C2C=CS3)C(=O)C=C1	5,11 ± 0,11	4,9 ± 0,01	4,59 ± 0,14	5,17 ± 0,72	4,95 ± 0,06	4,49 ± 0,01	<5,43	nd
59	COC1=C(OC)C=C(C=C1)C1=NN(C2CN(C2)C2=C3C=CSC3=NC(N)=N2)C(=O)[C@@H]2CC=CC[C@H]12	4,49 ± 0,01	4,96 ± 0,05	4,58 ± 0,08	5,54 ± 0,03	4,60 ± 0,02	4,49 ± 0,01	<5,69	nd
60	COC1=C(OC)C=C(C=C1)C1=NN(C2CN(C2)C2=C3SC=CC3=NC=N2)C(=O)[C@@H]2CC=CC[C@H]12	5,11 ± 0,03	4,77 ± 0,01	4,41 ± 0,07	5,73 ± 0,05	4,19 ± 0,01	4,29 ± 0,17	6,56 ± 0,01	8,93 ± 0,07
61	COC1=C(OC)C=C(C=C1)C1=NN(C2CN(C2)C(=O)CN2C(=O)CC(C)(C)CC2=O)C(=O)[C@@H]2CC=CC[C@H]12	4,82 ± 0,39	4,19 ± 0,01	4,29 ± 0,17	6,13 ± 0,23	4,19 ± 0,01	4,29 ± 0,17	6,54 ± 0,03	9,25 ± 0,04
62	COC1=C(OC)C=C(C=C1)C1=NN(C2CN(C2)C(=O)CN2C(=O)CC3(CCCCC3)CC2=O)C(=O)[C@@H]2CC=CC[C@H]12	5,74 ± 0,01	4,19 ± 0,01	4,19 ± 0,01	4,58 ± 0,32	4,19 ± 0,01	4,19 ± 0,01	6,99 ± 0,22	9,41 ± 0,09
63	COC1=C(OC)C=C(C=C1)C1=NN(C2CN(C2)C(=O)CN2C(=O)CC3(CCCC3)CC2=O)C(=O)[C@@H]2CC=CC[C@H]12	5,94 ± 0,31	4,31 ± 0,16	4,38 ± 0,12	5,05 ± 0,36	4,19 ± 0,01	4,19 ± 0,01	7,04 ± 0,18	9,07 ± 0,17
